# Supplementary material for: World Spread of Tropical Soda Apple (Solanum viarum) under Global Change: Historical Reconstruction, Niche Shift, and Potential Geographic Distribution
Source: MDPI journal article supplement (doi:10.3390/biology12091179), 2023-08-29
Supplement: s1 [file s1]

## Supplementary material

Table S1. Occurrence records of *Solanum viarum* details.

| Source                                                                                       | Number of occurrence records |
|----------------------------------------------------------------------------------------------|------------------------------|
| GBIF ( <a href="http://www.gbif.org/">http://www.gbif.org/</a> )                             | 1685                         |
| CVH ( <a href="http://www.cvh.ac.cn">http://www.cvh.ac.cn</a> )                              | 22                           |
| NSII ( <a href="http://www.nsii.org.cn">http://www.nsii.org.cn</a> )                         | 10                           |
| Web of Science ( <a href="https://www.webofscience.com/">https://www.webofscience.com/</a> ) | 320                          |

Table S2. Environmental variable contributions related to the distribution of *Solanum viarum*.

| Variables | Percent contribution (%) |
|-----------|--------------------------|
| bio12     | 50.1                     |
| bio1      | 24.3                     |
| bio3      | 11                       |
| bio14     | 6.3                      |
| bio7      | 3.5                      |
| bio19     | 3.5                      |
| bio2      | 0.8                      |
| LUC       | 0.4                      |

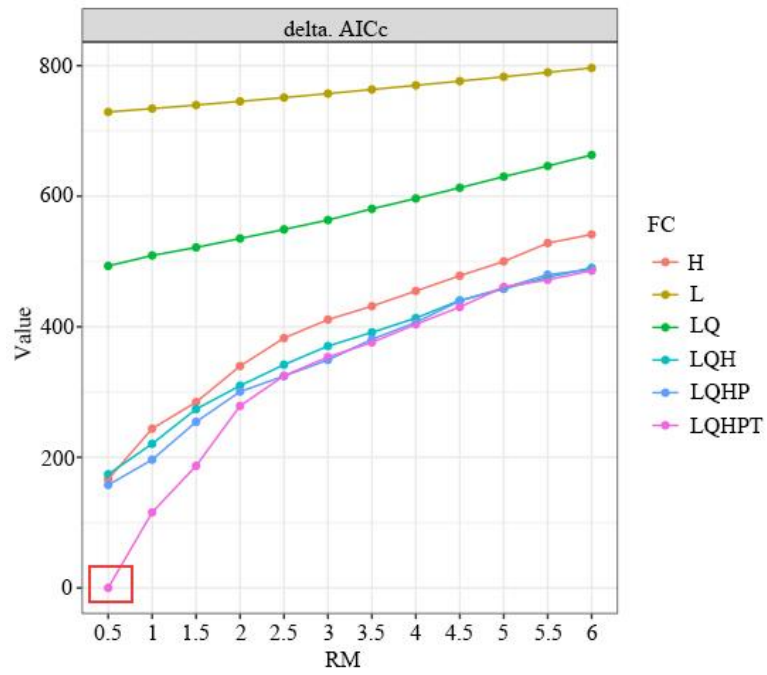

Figure S1. Parameter optimization results of Maxent on the occurrence records of *Solanum viarum*.

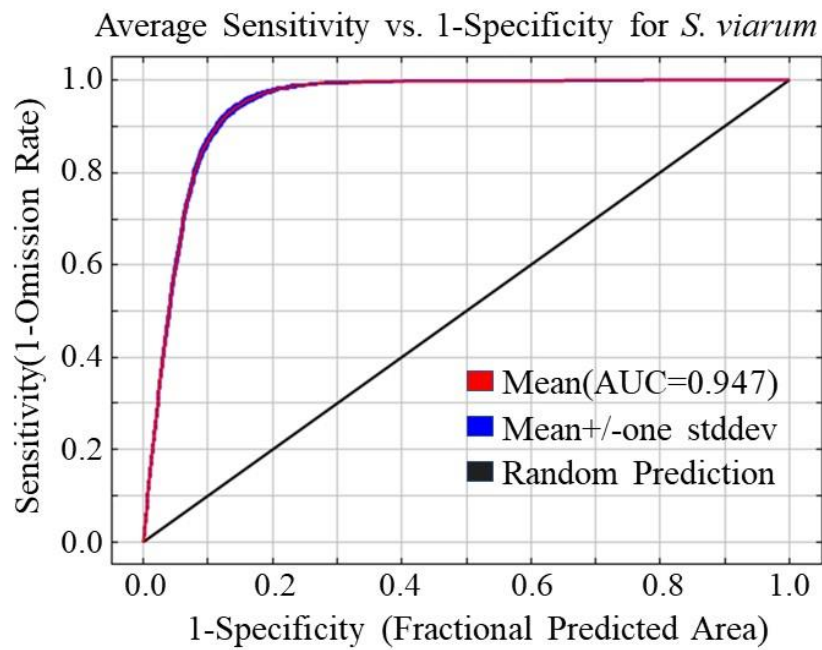

Figure S2. The Maxent model performance results.

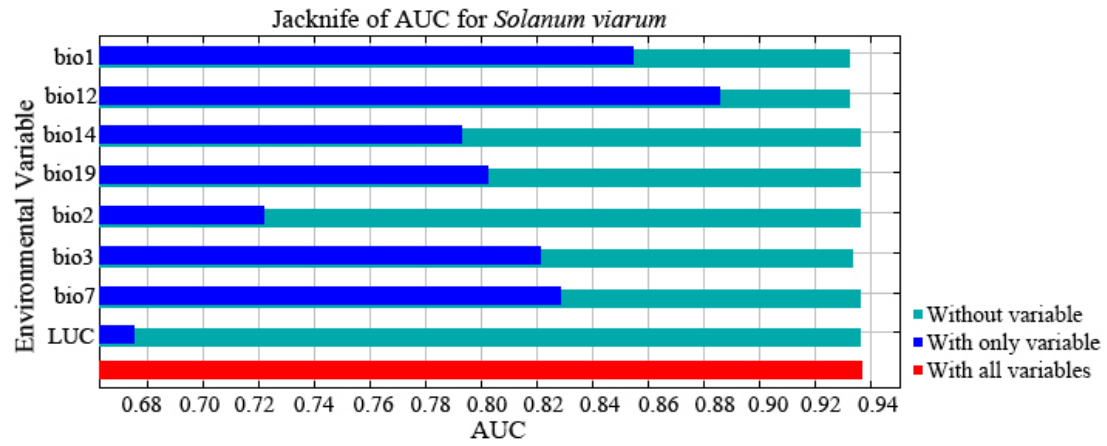

Figure S3. Results of the jackknife test of variable importance.

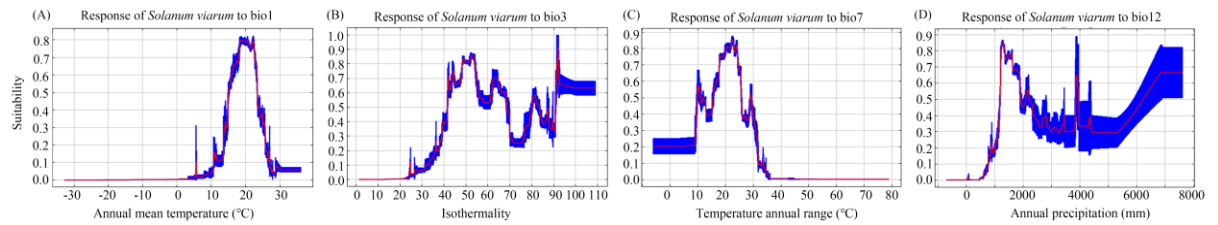

Figure S4. Response curves of important variables.

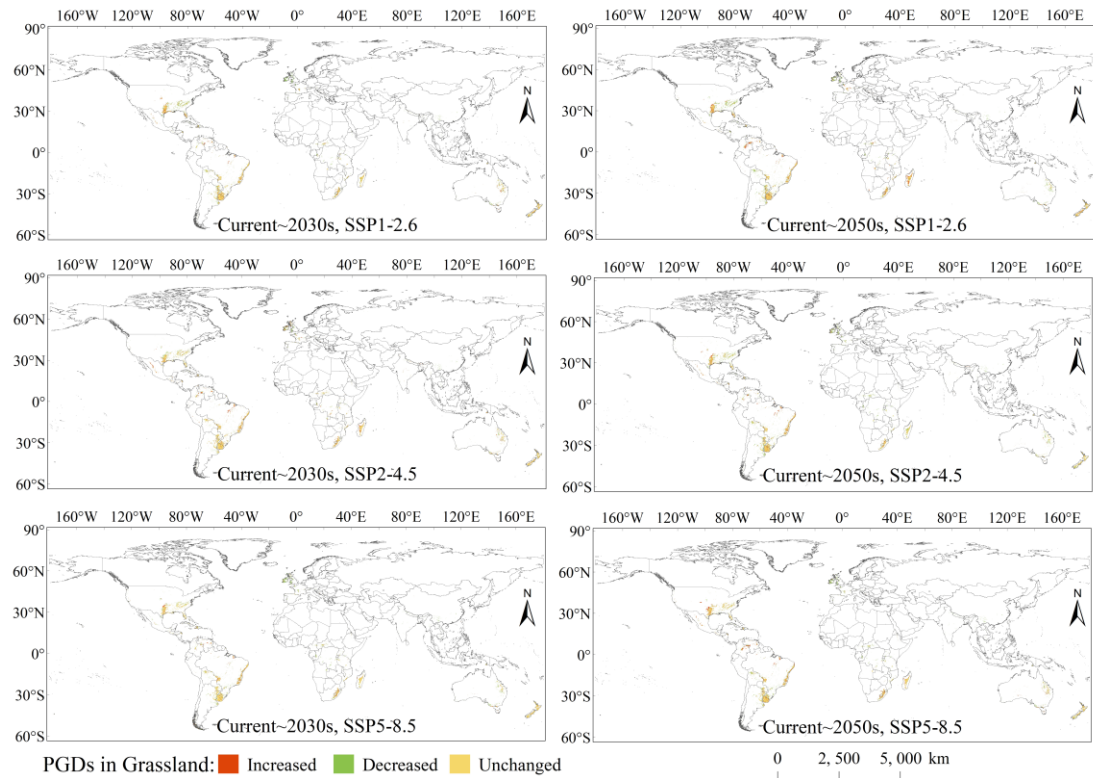

Figure S5. Variations of PGDs in grassland under climate changes.

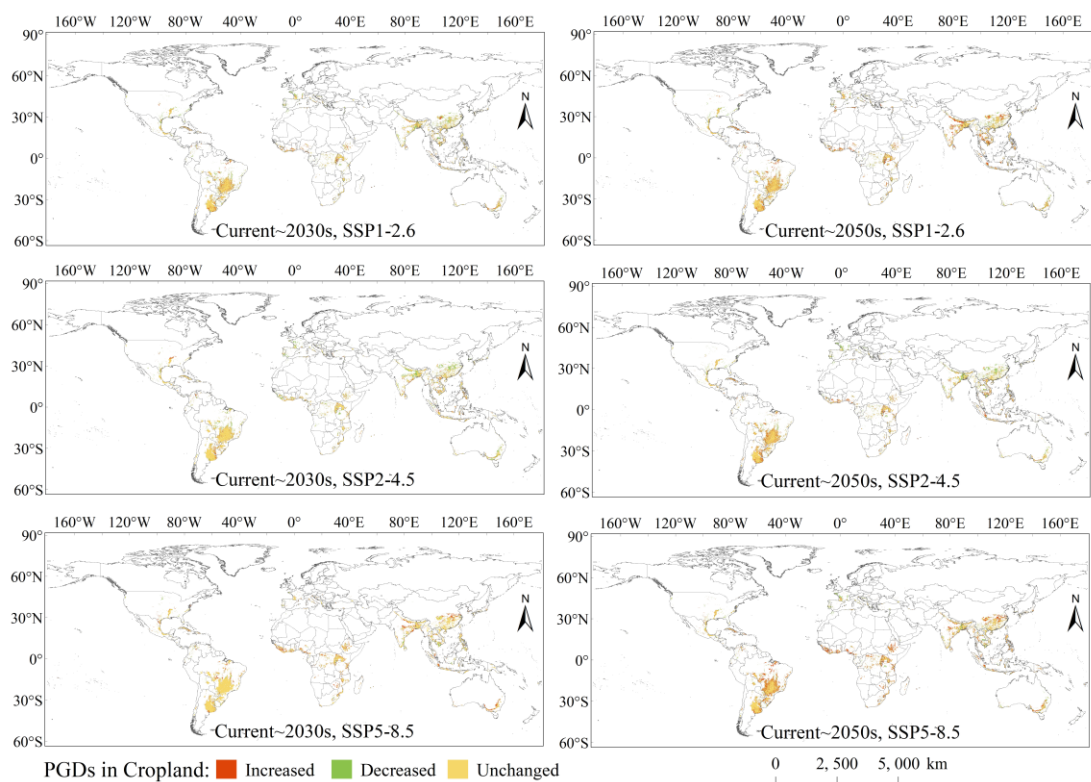

Figure S6. Variations of PGDs in cropland under climate changes.

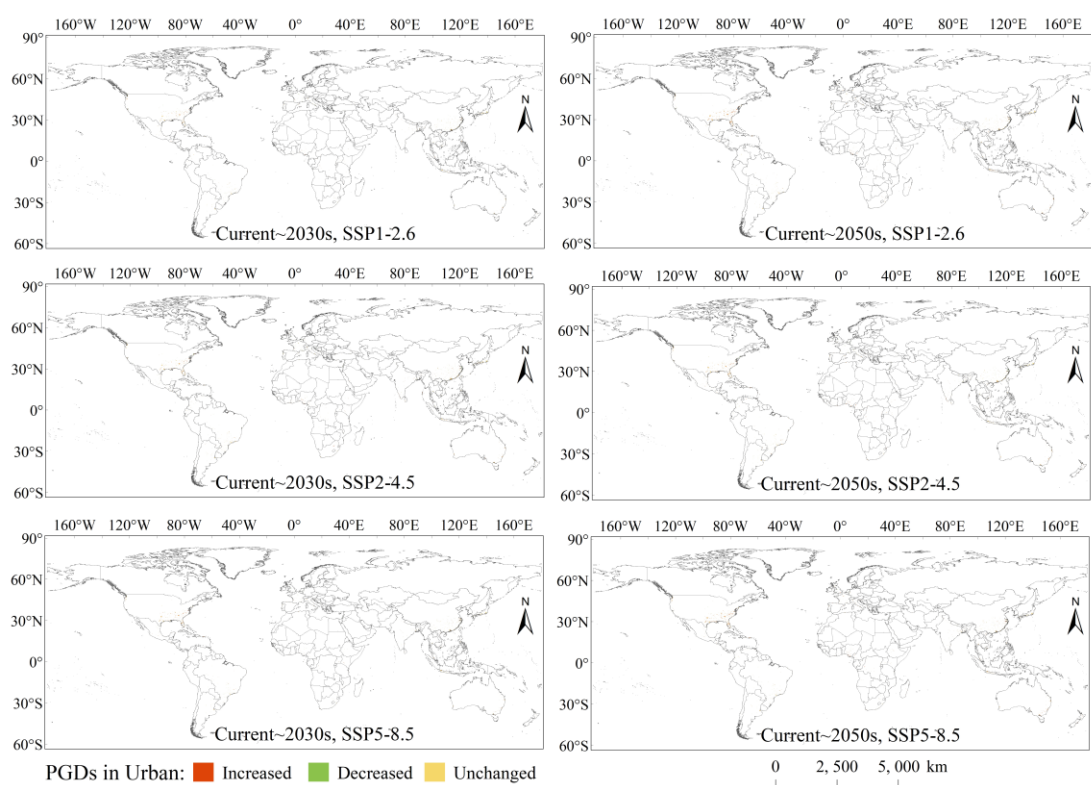

Figure S7. Variations of PGDs in urban under climate changes.
